# Supplementary material
Source: publisher figshare collection journal article supplement (https://karger.figshare.com/ndownloader/files/16499336)
Supplement: Supplementary file 1 [file 16499336]

**Supplementary Table 3. Focus and Type of Article of 164 Included Articles with Consistent and Inconsistent Usage of Term ‘Overdiagnosis’**

|  | **Consistent Usage** | |  | **Inconsistent Usage** | | | | | |
| --- | --- | --- | --- | --- | --- | --- | --- | --- | --- |
| **Focus on Overdiagnosis and**  **Type of Article** | **Overdefinition** | **Overdetection** |  | **Misdiagnosis (wrong diagnosis)** | **Misdiagnosis (criteria not met)** | **False-positive Test Results** | **Overtreatment** | **Overtesting** | **Unclear or Other** |
| **Explicit Definition (10 uses in 9 articles)** | | | | | | | | | |
| **Main focus (N = 8 articles)** |  |  |  |  |  |  |  |  |  |
| Commentary or letter |  |  |  |  |  |  |  |  |  |
| Narrative review (N = 2 articles) | 1 |  |  |  | 2 |  |  |  |  |
| Systematic review (N = 1 articles) |  |  |  |  | 1 |  |  |  |  |
| Primary research (N = 5 articles) |  |  |  | 1 | 4 |  |  |  |  |
| **Addressed – not main focus (N = 1 article)** |  |  |  |  |  |  |  |  |  |
| Commentary or letter |  |  |  |  |  |  |  |  |  |
| Narrative review |  |  |  |  |  |  |  |  |  |
| Systematic review |  |  |  |  |  |  |  |  |  |
| Primary research (N = 1 articles) |  |  |  | 1 |  |  |  |  |  |
| **Mentioned – no focus (N = 0 articles)** |  |  |  |  |  |  |  |  |  |
| Commentary or letter |  |  |  |  |  |  |  |  |  |
| Narrative review |  |  |  |  |  |  |  |  |  |
| Systematic review |  |  |  |  |  |  |  |  |  |
| Primary research |  |  |  |  |  |  |  |  |  |
| **Total Uses - Explicit** | 1 | 0 |  | 2 | 7 | 0 | 0 | 0 | 0 |
| **Implicit Definition (183 uses in 155 articles)** | | | | | | | | | |
| **Main focus (N = 82 articles)** |  |  |  |  |  |  |  |  |  |
| Commentary or letter (N = 30 articles) | 6 | 1 |  | 14 | 12 |  |  |  | 5 |
| Narrative review (N = 10 articles) | 2 |  |  | 7 | 4 |  |  |  |  |
| Systematic review (N = 1 article) |  |  |  |  | 1 |  |  |  |  |
| Primary research (N = 41 articles) | 4 |  |  | 27 | 13 | 1 |  |  | 2 |
| **Addressed – not main focus (N = 47 articles)** |  |  |  |  |  |  |  |  |  |
| Commentary or letter (N = 4 articles) |  |  |  |  | 3 |  |  |  | 1 |
| Narrative review (N = 15 articles) | 5 |  |  | 4 | 8 | 1 |  |  | 1 |
| Systematic review |  |  |  |  |  |  |  |  |  |
| Primary research (N = 28 articles) |  |  |  | 6 | 24 | 1 |  |  | 1 |
| **Mentioned – no focus (N = 26 articles)** |  |  |  |  |  |  |  |  |  |
| Commentary or letter (N = 1 articles) |  |  |  | 1 |  |  |  |  |  |
| Narrative review (N = 9 articles) | 2 |  |  | 1 | 1 |  |  |  | 6 |
| Systematic review (N = 2 articles) |  |  |  |  | 2 |  |  |  |  |
| Primary research (N = 14 articles) | 1 |  |  | 5 | 6 | 2 |  |  | 2 |
| **Total Uses – Implicit** | 20 | 1 |  | 65 | 74 | 5 | 0 | 0 | 18 |
